# Supplementary material for: Quality of reporting inflammatory bowel disease randomised controlled trials: a systematic review
Source: PubMed Central journal article supplement (PMC11033348; doi:10.1136/bmjgast-2023-001337), 2024-04-17
Supplement: bmjgast-2023-001337supp001.pdf [file bmjgast-2023-001337supp001.pdf]

## Appendix 1

### Search strategy

(random[Title/Abstract] OR factorial[Title/Abstract] OR crossover[Title/Abstract] OR cross over[Title/Abstract] OR cross-over[Title/Abstract] OR placebo[Title/Abstract] OR single blind[Title/Abstract] OR double blind[Title/Abstract] OR triple blind[Title/Abstract] OR assign[Title/Abstract] OR allocate[Title/Abstract] OR randomized controlled trial[Title/Abstract]) AND (Crohn disease[Title/Abstract] OR Crohn\*[Title/Abstract] OR Ulcerative colitis[Title/Abstract] OR ulcerative col\*[Title/Abstract] OR IBD[Title/Abstract] OR Inflammatory bowel disease\*[Title/Abstract])

## Appendix 2

### Analytical strategy

SPSS descriptive statistics and Chi-squared tests were conducted for statistical differences between pre-determined factors including studies published within journals with an IF to those with no IF, studies published in journals with an IF <5 to those with an IF >5, studies published in journals with an IF between 5-10 to those with an IF >10; studies with no-specified funding source to those with one, studies funded by public sponsorship to those funded by the industry, studies funded by the industry to those funded by both the industry and public sponsorship; studies published within the last three years to those published prior; and studies published by author groups with less than five authors to those with greater than five authors

Appendix 3 Risk of Bias comparing study centre setting

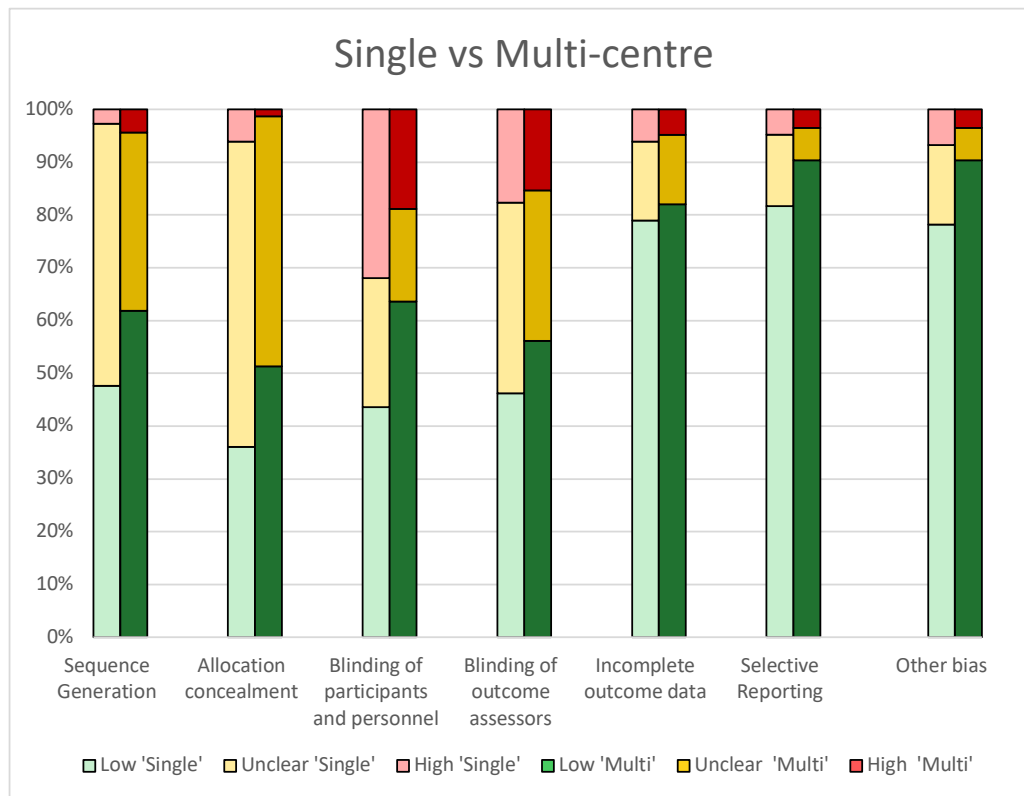

**Appendix 4** Unclear risk of bias and progression of reporting over time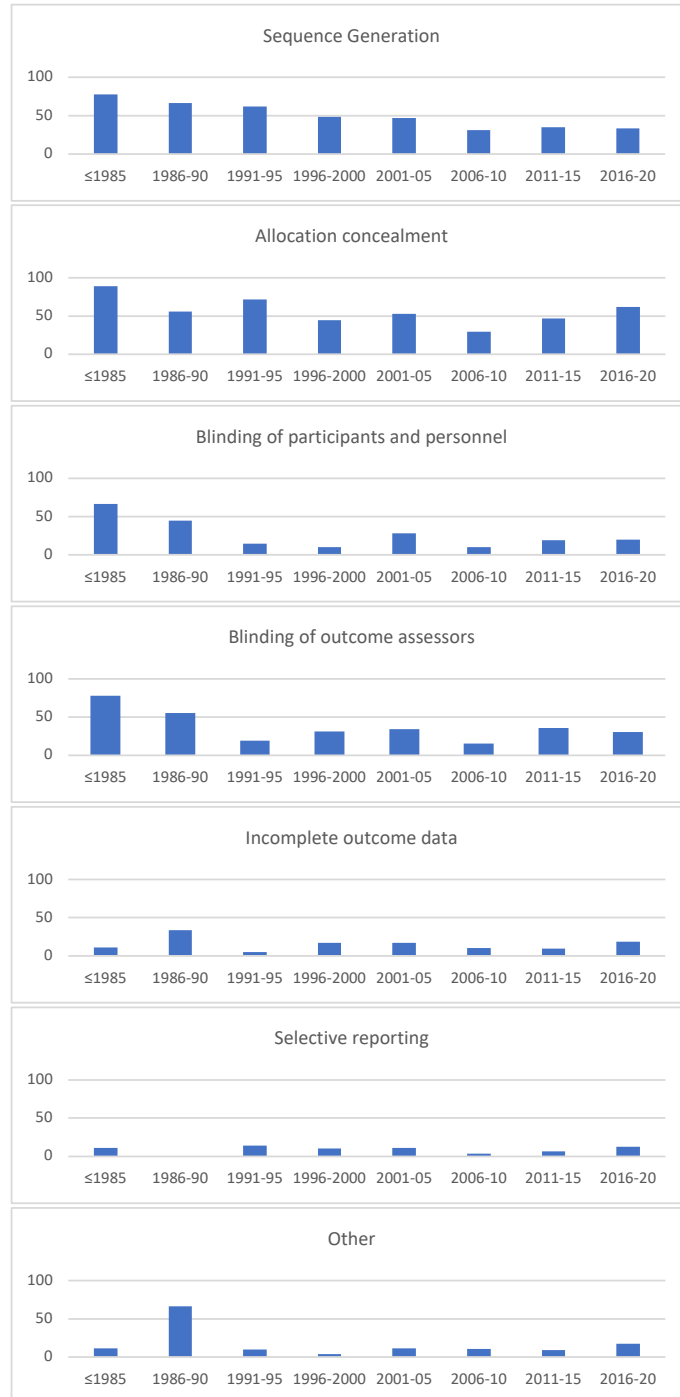

## Appendix 5

## Chi-squared comparison between pre-determined different factors

|               |                                                                                   |          |                     |          |                        |        |
|---------------|-----------------------------------------------------------------------------------|----------|---------------------|----------|------------------------|--------|
| Impact Factor | SG for NIF to IF                                                                  | *0.0122  | SG for IF <5 to >5  | **0.0019 | SG for IF 5-10 to >10  | 0.7779 |
|               | AC for NIF to IF                                                                  | 0.0576   | AC for IF <5 to >5  | *0.0380  | AC for IF 5-10 to >10  | 0.2957 |
|               | BPP for NIF to IF                                                                 | 0.1550   | BPP for IF <5 to >5 | *0.0284  | BPP for IF 5-10 to >10 | 0.4271 |
|               | BOA for NIF to IF                                                                 | *0.0228  | BOA for IF <5 to >5 | 0.1252   | BOA for IF 5-10 to >10 | 0.8664 |
|               | IOD for NIF to IF                                                                 | *0.0241  | IOD for IF <5 to >5 | 0.4051   | IOD for IF 5-10 to >10 | 0.6523 |
|               | SR for NIF to IF                                                                  | **0.0018 | SR for IF <5 to >5  | *0.0376  | SR for IF 5-10 to >10  | 0.2218 |
|               | OR for NIF to IF                                                                  | *0.0104  | OR for IF <5 to >5  | 0.6130   | OR for IF 5-10 to >10  | 0.8053 |
|               | p-value when comparing papers published in journals with different impact factors |          |                     |          |                        |        |

|         |                                                         |         |                            |         |                         |        |
|---------|---------------------------------------------------------|---------|----------------------------|---------|-------------------------|--------|
| Funding | SG for NS to Funded                                     | 0.0583  | SG for Public to Industry  | 0.2278  | SG for Industry to I+P  | 0.9709 |
|         | AC for NS to Funded                                     | *0.0029 | AC for Public to Industry  | 0.8529  | AC for Industry to I+P  | 0.1559 |
|         | BPP for NS to Funded                                    | *0.0034 | BPP for Public to Industry | 0.0502  | BPP for Industry to I+P | 0.1576 |
|         | BOA for NS to Funded                                    | 0.0644  | BOA for Public to Industry | *0.0187 | BOA for Industry to I+P | 0.6194 |
|         | IOD for NS to Funded                                    | 0.8951  | IOD for Public to Industry | *0.0425 | IOD for Industry to I+P | 0.4394 |
|         | SR for NS to Funded                                     | 0.1222  | SR for Public to Industry  | *0.0316 | SR for Industry to I+P  | 0.9260 |
|         | OR for NS to Funded                                     | 0.3804  | OR for Public to Industry  | 0.0574  | OR for Industry to I+P  | 0.4980 |
|         | p-value comparing papers with different funding sources |         |                            |         |                         |        |

|                     |                                                                               |         |
|---------------------|-------------------------------------------------------------------------------|---------|
| Reporting over time | SG for <2017 to >2017                                                         | 0.1152  |
|                     | AC for <2017 to >2017                                                         | *0.0372 |
|                     | BPP for <2017 to >2017                                                        | 0.1557  |
|                     | BOA for <2017 to >2017                                                        | 0.0866  |
|                     | IOD for <2017 to >2017                                                        | 0.9310  |
|                     | SR for <2017 to >2017                                                         | 0.8664  |
|                     | OR for <2017 to >2017                                                         | 0.4742  |
|                     | p-value when comparing papers published in the past 3-years to those previous |         |

|              |                                                                         |         |
|--------------|-------------------------------------------------------------------------|---------|
| Author group | SG for <5 to >5                                                         | *0.0140 |
|              | AC for <5 to >5                                                         | 0.1544  |
|              | BPP for <5 to >5                                                        | *0.0206 |
|              | BOA for <5 to >5                                                        | 0.1222  |
|              | IOD for <5 to >5                                                        | 0.5509  |
|              | SR for <5 to >5                                                         | 0.7845  |
|              | OR for <5 to >5                                                         | 0.2338  |
|              | p-value when comparing papers published by different author group sizes |         |

## Legend

SG - Sequence generation  
AC - Allocation concealment  
BPP - Blinding of participants and personnel  
BOA - Blinding of outcome assessors  
IOD - Incomplete outcome data  
SR - Selective reporting  
OR - Other bias  
IF - Impact factor  
NIF - No IF  
NS - Not specified  
I+P - Industry & Public  
\* - p <0.05  
\*\* - p <0.01
